# Supplementary material for: Prediction of Permeate Flux in Ultrafiltration Processes: A Review of Modeling Approaches
Source: MDPI journal article supplement (doi:10.3390/membranes11050368), 2021-05-18
Supplement: s1 [file s1]

## SUPPLEMENTARY MATERIAL

**Table 1: Description of equations used for performance analysis of selected models to predict permeate flux in ultrafiltration processes**

| Equation                                                    | Description                                                             | Nomenclature                                                                                                                                          | Models tested with this equation                                                                                                                                                                    | Reference |
|-------------------------------------------------------------|-------------------------------------------------------------------------|-------------------------------------------------------------------------------------------------------------------------------------------------------|-----------------------------------------------------------------------------------------------------------------------------------------------------------------------------------------------------|-----------|
| $\mu = 8,8E-4 + 1,2E-5 C_b + 1,41E-7 C_b^2 + 8,7E-10 C_b^3$ | Equation used for viscosity estimation                                  | $\mu$ = Viscosity<br>$C_b$ = Bulk concentration                                                                                                       | - Shear-Induced (Davis)<br>- Dynamic (Song)<br>- Kenden & Katchalsky<br>- Wijmans <i>et al</i><br>- Hagen-Poiseuille<br>- De & Bhattacharya<br>- Ho & Zydney                                        | [1]       |
| $\frac{C_b}{C_{bo}} = \frac{V_o}{V_o - V}$                  | Equation used for estimations of feed concentration and permeate volume | $C_b$ = Bulk concentration<br>$C_{bo}$ = Feed concentration<br>$V$ = Total permeate volume<br>$V_o$ = Initial volume                                  | - Shear-Induced (Davis)<br>- Dynamic (Song)<br>- Hagen-Poiseuille<br>- De & Bhattacharya                                                                                                            | [2]       |
| $D = \sum D_i Z_i$                                          | Equation used for diffusivity estimation                                | $D$ = Diffusivity<br>$D_i$ = Diffusivity of solid i<br>$Z_i$ = Weight fraction of suspended solid i<br>i = Refers to each existing solid in the juice | - Shear-Induced (Davis)<br>- Wijmans <i>et al</i><br>- De & Bhattacharya                                                                                                                            | [1]       |
| $\rho = 999,7 + 5,1E-1 C_{bo} + 2,1E-3 C_{bo}^2$            | Equation used for density estimation                                    | $\rho$ = Density<br>$C_{bo}$ = Feed concentration                                                                                                     | - Shear-Induced (Davis)<br>- Dynamic (Song)<br>- Kenden & Katchalsky<br>- Wijmans <i>et al</i><br>- Hagen-Poiseuille<br>- De & Bhattacharya<br>- Ho & Zydney<br>- Mondal & De<br>- Yee <i>et al</i> | [1]       |
| $\varepsilon = N \frac{\pi}{4} d_p^2$                       | Equation used for porosity estimation                                   | $\varepsilon$ = Porosity<br>$N$ = Pore density<br>$d_p$ = Pore diameter                                                                               | - Wijmans <i>et al</i><br>- Hagen-Poiseuille<br>- De & Bhattacharya                                                                                                                                 | [3]       |
| $J = \frac{ \Delta P  -  \Delta \pi }{\mu R_m}$             | Equation used to determine osmotic pressure ( $\Delta \pi$ )            | $J$ = Flux of permeate<br>$\Delta P$ = Transmembrane pressure<br>$\mu$ = Viscosity<br>$R_m$ = Hydraulic resistance                                    | - Kenden & Katchalsky<br>- Wijmans <i>et al</i>                                                                                                                                                     | [4]       |

|                                                                                                                                                       |                                                                                                                  |                                                                                                                                                                                                                                                                                                                     |                                               |     |
|-------------------------------------------------------------------------------------------------------------------------------------------------------|------------------------------------------------------------------------------------------------------------------|---------------------------------------------------------------------------------------------------------------------------------------------------------------------------------------------------------------------------------------------------------------------------------------------------------------------|-----------------------------------------------|-----|
| $Sh = \frac{k d}{D}$                                                                                                                                  | Sherwood number used for estimation of the mass transfer coefficient                                             | Sh = Sherwood number<br>k = Mass transfer coefficient<br>d = Diameter module<br>D = Diffusivity                                                                                                                                                                                                                     | - Wijmans <i>et al</i><br>- De & Bhattacharya | [5] |
| $r_p = 180 \frac{(1-\epsilon)^2}{a_p^2 \epsilon^3}$                                                                                                   | Carman-Kozeny' equation used to determine the specific resistance ( $r_p$ )                                      | $\epsilon$ = Porosity of the concentration polarisation layer<br>$a_p$ = Average solute particle diameter                                                                                                                                                                                                           | Wijmans <i>et al</i>                          | [6] |
| $R_p = r_p \delta_p$                                                                                                                                  | Resistance of concentration polarisation layer ( $R_p$ )                                                         | $r_p$ = Specific resistance<br>$\delta_p$ = Thickness of concentration layer                                                                                                                                                                                                                                        | - Wijmans <i>et al</i><br>- Ho & Zydney       | [6] |
| $\delta_p = \frac{k}{D}$                                                                                                                              | Thickness of concentration layer ( $\delta_p$ )                                                                  | k = Mass transfer coefficient<br>D = Diffusivity                                                                                                                                                                                                                                                                    | - Wijmans <i>et al</i><br>- De & Bhattacharya | [3] |
| $\delta_* = \left( \frac{144 D L C_b^*}{\left(3 + \left(\frac{1}{n}\right)\right) U_o d^2 C_g^*} \right)^{1/3} x_*^{1/3}$                             | Equation used for estimation of the non-dimensional thickness of the concentration boundary layer ( $\delta_*$ ) | D = Effective diffusivity of the gel forming solutes<br>L = Module length<br>Cb* = Non-dimensional bulk concentration<br>n = Flow behavior index<br>Uo = Maximum fluid velocity (centerline velocity)<br>d = Module diameter<br>Cg* = Non-dimensional gel layer concentration<br>X* = x/L (x=distance along x-axis) | De & Bhattacharya                             | [7] |
| $Sh = 1,145 \left(3 + \frac{1}{n}\right)^{1/3} \left(Re^* Sc^* \frac{d}{L}\right)^{1/3} \left(e^{(-2/3)\alpha C_0 (C_g^* - C_b^*)}\right)^{0.1}$      | Sherwood number – Hollow fiber configuration                                                                     | Re= Reynolds number<br>Sc = Schmidt number<br>Cb* = Non-dimensional bulk concentration<br>Cg* = Non-dimensional gel layer concentration<br>L = Module length<br>d = Module diameter<br>n = Flow behavior index                                                                                                      | De & Bhattacharya                             | [7] |
| $Sh = 1,816 \left(Re^* Sc^* \frac{d}{L}\right)^{1/3} \left(e^{(-2/3)\alpha C_0 (C_g^* - C_b^*)}\right)^{0.14} \left(\frac{C_g^*}{C_b^*}\right)^{1/3}$ | Sherwood number – Tubular configuration                                                                          | Re= Reynolds number<br>Sc = Schmidt number<br>Cb* = Non-dimensional bulk concentration                                                                                                                                                                                                                              | De & Bhattacharya                             | [8] |

|                                        |                                                                                                       |                                                                                                                                     |                   |     |
|----------------------------------------|-------------------------------------------------------------------------------------------------------|-------------------------------------------------------------------------------------------------------------------------------------|-------------------|-----|
|                                        |                                                                                                       | $C_g^*$ = Non-dimensional gel layer concentration<br>$L$ = Module length<br>$d$ = Module diameter<br>$n$ = Flow behavior index      |                   |     |
| $R_g = \beta(1-\varepsilon_g)\rho_g H$ | Gel layer resistance ( $R_g$ )                                                                        | $\rho_g$ = Gel layer density<br>$H$ = Gel layer height<br>$\varepsilon_g$ = Gel layer porosity<br>$\beta$ = Specific gel resistance | De & Bhattacharya | [7] |
| $R_{CPB}^* = \exp(k_1 t) - 1$          | Equation used for estimation of the non-dimensional complete pore blocking resistance ( $R_{CPB}^*$ ) | $k_1$ = Complete pore blocking constant<br>$t$ = Time                                                                               | Mondal & De       | [9] |
| $R_c^* = \frac{R_p}{R_m}$              | Equation used for estimation of the non-dimensional cake resistance ( $R_c^*$ )                       | $R_p$ = Resistance of concentration polarisation layer<br>$R_m$ = Hydraulic resistance of membrane                                  | Mondal & De       | [9] |

- [1] P.K. Bhattacharya, S. Agarwal, S. De, U.V.S. Rama Gopal, Ultrafiltration of sugar cane juice for recovery of sugar: Analysis of flux and retention, Sep. Purif. Technol. 21 (2001) 247–259. [https://doi.org/10.1016/S1383-5866\(00\)00209-4](https://doi.org/10.1016/S1383-5866(00)00209-4).
- [2] T. Furukawa, K. Kokubo, K. Nakamura, K. Matsumoto, Modeling of the permeate flux decline during MF and UF cross-flow filtration of soy sauce lees, J. Memb. Sci. 322 (2008) 491–502. <https://doi.org/10.1016/j.memsci.2008.05.068>.
- [3] M. Cheryan, Ultrafiltration and Microfiltration Handbook, 1998. <https://doi.org/97-62251>.
- [4] J. Huter, Model-Based Design and Process Optimization of Continuous Single Pass Tangential Flow Filtration Focusing on Continuous Bioprocessing, Processes. (2019).
- [5] S. Mondal, Chhaya, S. De, Modeling of cross flow ultrafiltration of stevia extract in a rectangular cell, J. Food Eng. 112 (2012) 326–337. <https://doi.org/10.1016/j.jfoodeng.2012.05.002>.
- [6] K. Damak, A. Ayadi, P. Schmitz, B. Zeghamati, Modeling of crossflow membrane separation processes under laminar flow conditions in tubular membrane, Desalination. 168 (2004) 231–239. <https://doi.org/10.1016/j.desal.2004.07.003>.
- [7] S. Mondal, A. Cassano, C. Conidi, S. De, Modeling of gel layer transport during ultrafiltration of fruit juice with non-Newtonian fluid rheology, Food Bioprod. Process. 100 (2016) 72–84. <https://doi.org/10.1016/j.fbp.2016.06.012>.
- [8] S. Mondal, A. Cassano, F. Tasselli, S. De, A generalized model for clarification of fruit juice during ultrafiltration under total recycle and batch mode, J. Memb. Sci. 366 (2011) 295–303. <https://doi.org/10.1016/j.memsci.2010.10.015>.
- [9] S. Mondal, S. De, Generalized criteria for identification of fouling mechanism under steady state membrane filtration, J. Memb. Sci. (2009). <https://doi.org/10.1016/j.memsci.2009.08.015>.
